# Supplementary material for: Cardiac Functional and Structural Abnormalities in a Mouse Model of CDKL5 Deficiency Disorder
Source: MDPI journal article supplement (doi:10.3390/ijms24065552), 2023-03-14
Supplement: s1 [file s1]

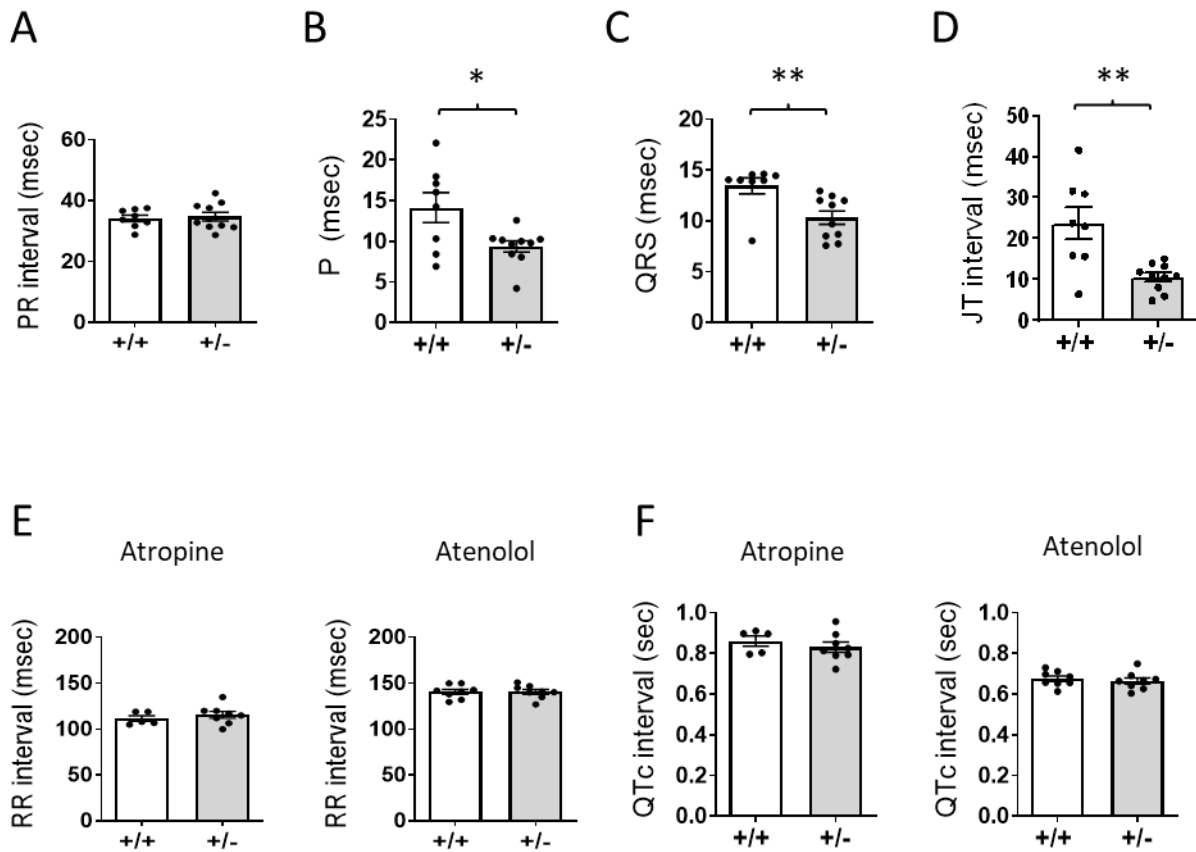

### Supplementary Figure S1.

**A-D:** Baseline ECG parameters calculated during non-rapid-eye-movement sleep (NREMS) in *Cdkl5* +/+ (n=8) and *Cdkl5* +/- (n=10) female mice. **A:** Mean interval between the beginning of the P wave (onset of atrial depolarization) and the beginning of the QRS complex (onset of ventricular depolarization). **B:** Mean duration of atrial depolarization (P wave). **C:** Mean duration of the depolarization of the right and left ventricles (QRS complex). **D:** Mean duration of ventricular repolarization (JT interval). **E,F:** Absolute value of RR (mean heart period duration, E) and QTc (mean duration of interval between Q and T waves after applying Hodge's formula, F) intervals after either Atropine (*Cdkl5* +/+ n= 5 and *Cdkl5* +/- n= 8) or Atenolol (*Cdkl5* +/+ n= 8 and *Cdkl5* +/- n= 8) infusion. Results are presented as means  $\pm$  SEM. \* p<0.05, \*\* p<0.01; (two-tailed Student's t-test after 2-way ANOVA).

| Gene          |         | Primer sequence (5'-3') |
|---------------|---------|-------------------------|
| <i>Cdkl5</i>  | Forward | TGCAGACACAAGGAAACACATGA |
|               | Reverse | TTTCCTGCTTGAGAGTGCGAA   |
| <i>Gapdh</i>  | Forward | CCAGTGAGCTTCCCGTTCA     |
|               | Reverse | GAACATCATCCCTGCATCCA    |
| <i>Actb</i>   | Forward | AAGTGGTTACAGGAAGTCC     |
|               | Reverse | ATAATTTACACAGAAGCAATGC  |
| <i>Kcnq1</i>  | Forward | ATCGGTGCCCCTCTGAACAG    |
|               | Reverse | TTGCTGGGTAGGAAGAGCTCA   |
| <i>Kcnh2</i>  | Forward | GATCGCCTTCTACCGAAA      |
|               | Reverse | CATTCTTCACGGGTACCACA    |
| <i>Kcnj2</i>  | Forward | CCCCATGATCCTGTACCAG     |
|               | Reverse | ATGGATGCTTCGAGAACC      |
| <i>Scn5a</i>  | Forward | GCAGAAGGTGAAGTTCGTGG    |
|               | Reverse | TGAAGACCAAGTTCCGACC     |
| <i>Hcn4</i>   | Forward | CGACAGCGCATCCATGACTA    |
|               | Reverse | GCTGGAAGACCTCGAAACGC    |
| <i>Chrm2</i>  | Forward | CCCCAATACAGTGTGGACAA    |
|               | Reverse | GCAGGGTTGATGGTGCTATT    |
| <i>Adrb1</i>  | Forward | GCTCTGGACTTCGGTAGATGTG  |
|               | Reverse | CGTCAGCAAACCTCTGGTAGCGA |
| <i>Col1a2</i> | Forward | CACCCCAGCGAAGAACTCAT    |
|               | Reverse | TCTCCTCATCCAGGTACGCA    |
| <i>Col3a1</i> | Forward | TGACTGTCCCACGTAAGCAC    |
|               | Reverse | AGGGCCATAGCTGAACTGAA    |
| <i>Gja1</i>   | Forward | GAGAGCCCGAACTCTCCTTT    |
|               | Reverse | TGGGCACCTCTCTTTCACTT    |

**Supplementary Table S1.** List of primers used for quantitative RT-PCR.

| Antibody against         | Description       | Use/Dilution | Product nr and Manufacturer         |
|--------------------------|-------------------|--------------|-------------------------------------|
| Actinin                  | Goat polyclonal   | IHC 1:100    | 17829, Santa Cruz Biotechnology     |
| AKT                      | Rabbit polyclonal | WB 1:1000    | 4691, Cell Signaling Technology     |
| β-Catenin                | Rabbit polyclonal | WB 1:500     | 05665, Millipore                    |
|                          |                   | IHC 1:300    |                                     |
| Cx43                     | Rabbit monoclonal | WB 1:500     | 3512, Cell Signaling Technology     |
|                          |                   | IHC 1:200    |                                     |
| ERK1/2                   | Rabbit polyclonal | WB 1:1000    | 4695, Cell Signaling Technology     |
| GAPDH                    | Rabbit polyclonal | WB 1:5000    | G9545, Sigma-Aldrich                |
| GSK-3β                   | Rabbit polyclonal | WB 1:1000    | 9315, Cell Signaling Technology     |
| LC3B                     | Rabbit polyclonal | WB 1:1000    | PA1-16930, Thermo Fisher Scientific |
| Nrf 2                    | Rabbit polyclonal | WB 1:500     | 365949, Santa Cruz Biotechnology    |
| P-AKT (Ser473)           | Rabbit polyclonal | WB 1:1000    | 4060, Cell Signaling Technology     |
| P-ERK1/2 (Thr202/Tyr204) | Rabbit polyclonal | WB 1:1000    | 9101, Cell Signaling Technology     |
| P-GSK-3β (Ser9)          | Rabbit polyclonal | WB 1:1000    | 5558, Cell Signaling Technology     |
| PARP1                    | Rabbit polyclonal | WB 1:500     | 227244, Abcam                       |
| Vimentin                 | Mouse monoclonal  | WB 1:500     | V6630, Sigma-Aldrich                |

| Secondary antibodies   |           |              |                                                        |
|------------------------|-----------|--------------|--------------------------------------------------------|
| Antibody               | Conjugate | Use/Dilution | Product nr and Manufacturer                            |
| Donkey Anti-Rabbit IgG | Cy3       | IHC 1:200    | 711-165-152, Jackson ImmunoResearch Laboratories, Inc. |
| Donkey Anti-Goat IgG   | Cy3       | WB 1:200     | 705-165-147, Jackson ImmunoResearch Laboratories, Inc. |
| Goat Anti-Mouse IgG    | Cy3       | IHC 1:200    | 115-165-062, Jackson ImmunoResearch Laboratories, Inc. |
| Goat Anti-Mouse IgG    | HRP       | WB 1:5000    | 115-005-003, Jackson ImmunoResearch Laboratories, Inc. |
| Goat Anti-Rabbit IgG   | HRP       | WB 1:5000    | 111-035-003, Jackson ImmunoResearch Laboratories, Inc. |

**Supplementary Table S2** \*WB, western blot; IHC, Immunohistochemistry
